# Supplementary material for: Pollen-based climatic reconstructions for the interglacial analogues of MIS 1 (MIS 19, 11, and 5) in the southwestern Mediterranean: insights from ODP Site 976
Source: Copernicus journal article supplement (doi:10.5194/cp-21-489-2025), 2025-02-18
Supplement: Supplementary file 1 [file cp-21-489-2025-supplement.zip]

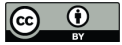

*Supplement of*

**Pollen-based climatic reconstructions for the interglacial analogues of MIS 1 (MIS 19, 11, and 5) in the southwestern Mediterranean: insights from ODP Site 976**

**Dael Sassoon et al.**

*Correspondence to:* Dael Sassoon (dael.sassoon@gmail.com)

- cp-21-489-2025-supplement-title-page.pdf
- Figure S1.pdf
- Figure S2.pdf
- Figure S3.pdf
- Figure S4.pdf
- Figure S5.pdf
- Supplementary\_material\_Sassoon\_et\_al.pdf

The copyright of individual parts of the supplement might differ from the article licence.
