# Supplementary material for: Pollen-based climatic reconstructions for the interglacial analogues of MIS 1 (MIS 19, 11, and 5) in the southwestern Mediterranean: insights from ODP Site 976
Source: Copernicus journal article supplement (doi:10.5194/cp-21-489-2025), 2025-02-18

## Supplementary material

Figure S1 – Pollen diagrams showing the percentage of temperate and Mediterranean taxa for each record from the long marine core ODP 976: A) MIS 1 (Combourieu-Nebout *et al.*, 2009); (B) MIS 5 (Combourieu-Nebout *et al.*, 2002; Masson-Delmotte *et al.*, 2005); (C) MIS 11 (Sassoon *et al.*, 2023); (D) MIS 19 (Toti *et al.*, 2020).

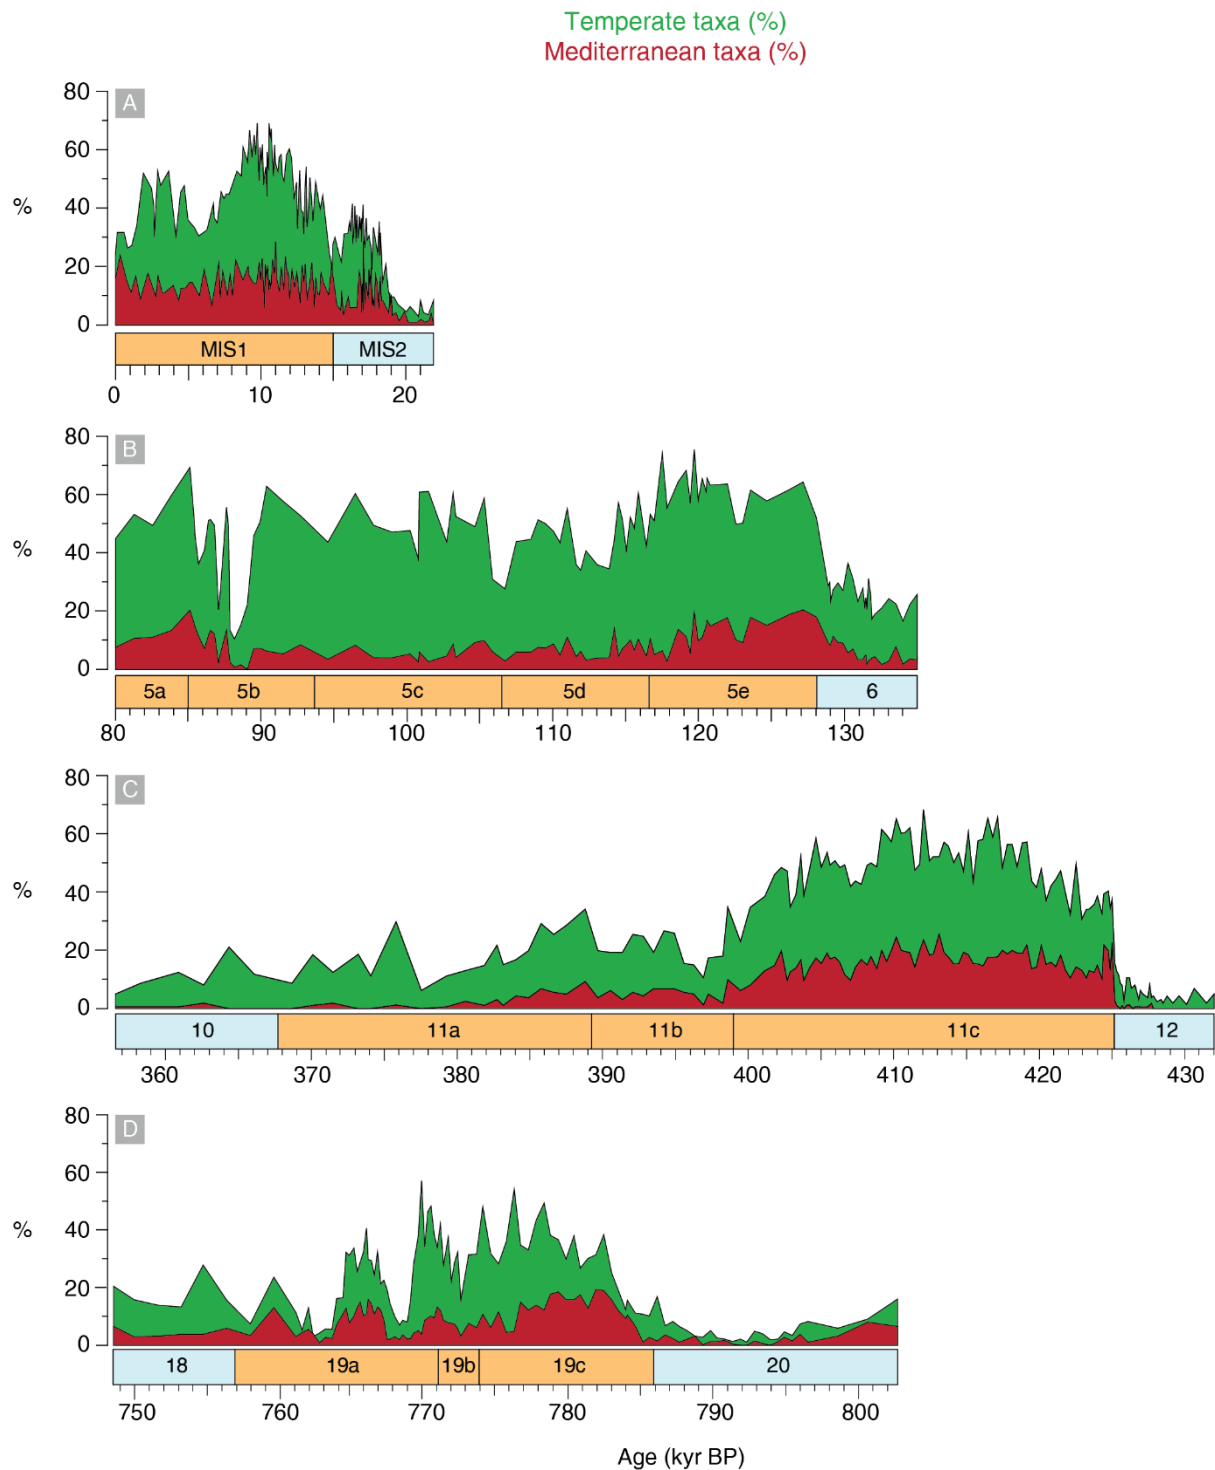

Figure S2 – Quantitative climate reconstructions from pollen analyses obtained for MIS 19 using the BRT (red: dotted line corresponds to error), MAT (blue) and WAPLS (green) methods. Present-day values for temperature (TANN, Tsum and Twin) and precipitation (PANN, Psum and Pwin) are represented by red dots.

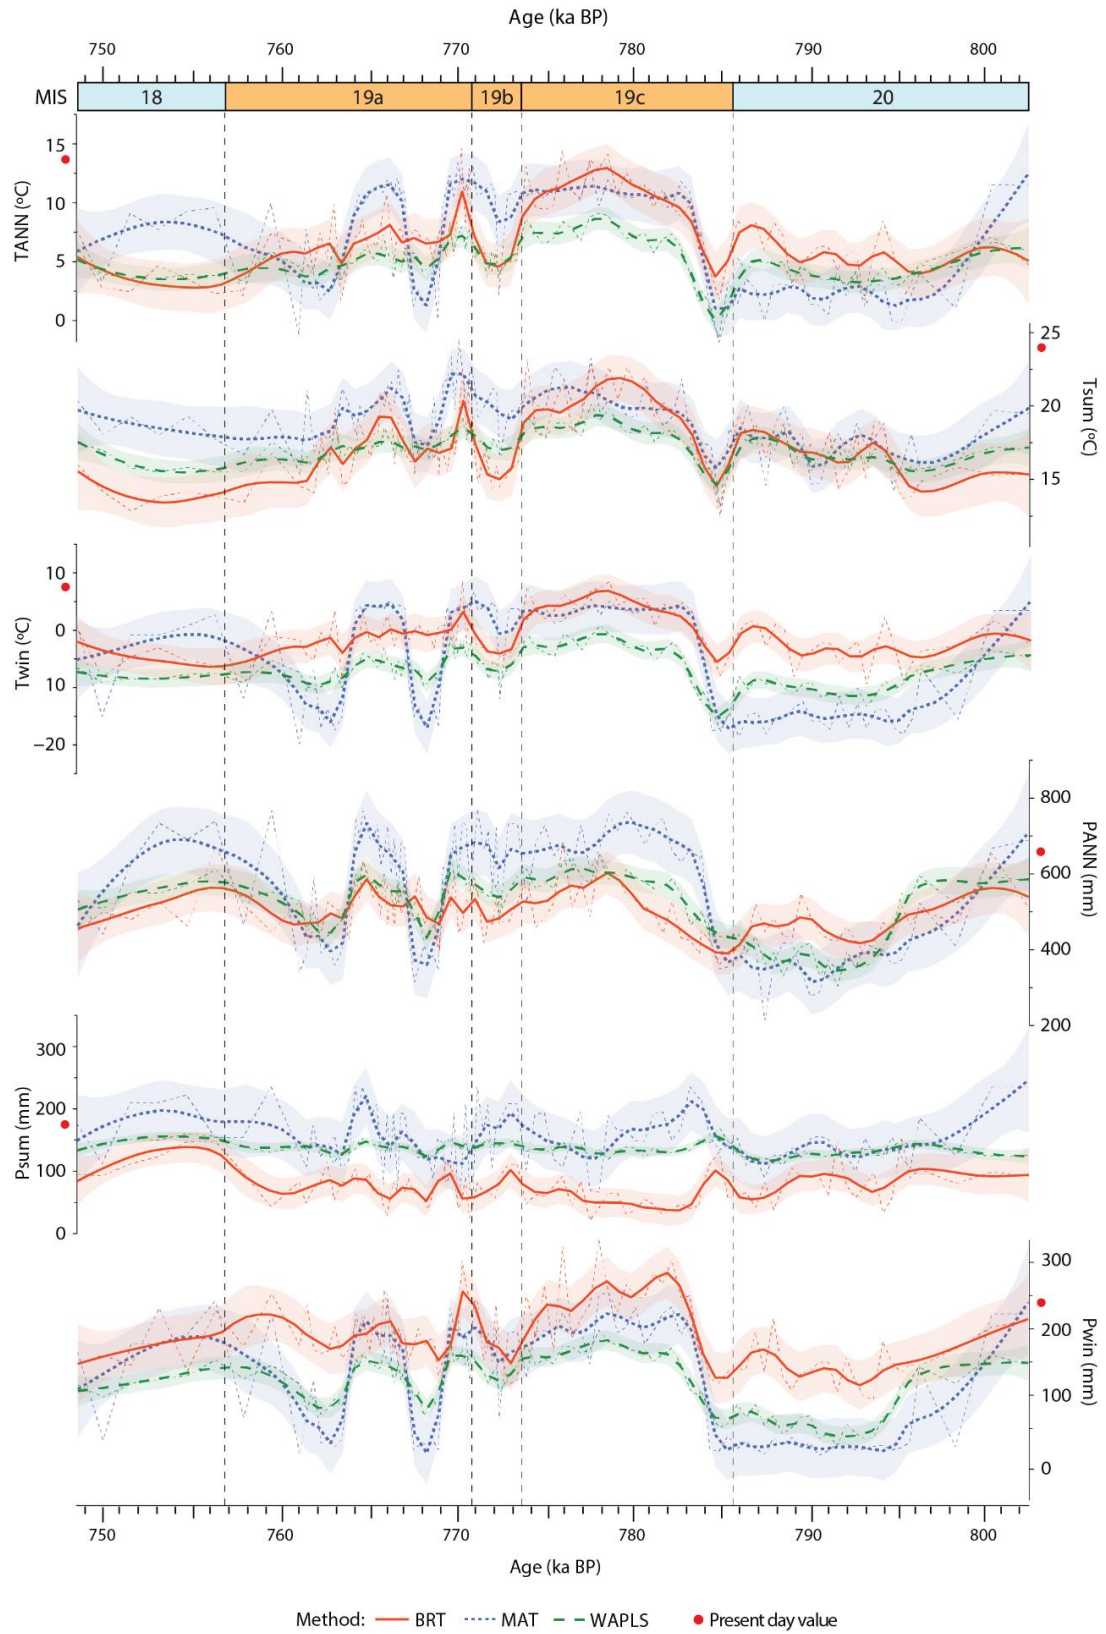

Figure S3 – Quantitative climate reconstructions from pollen analyses obtained for MIS 11 using the BRT (red: dotted line corresponds to error), MAT (blue) and WAPLS (green) methods. Present-day values for temperature (TANN, Tsum and Twin) and precipitation (PANN, Psum and Pwin) are represented by red dots.

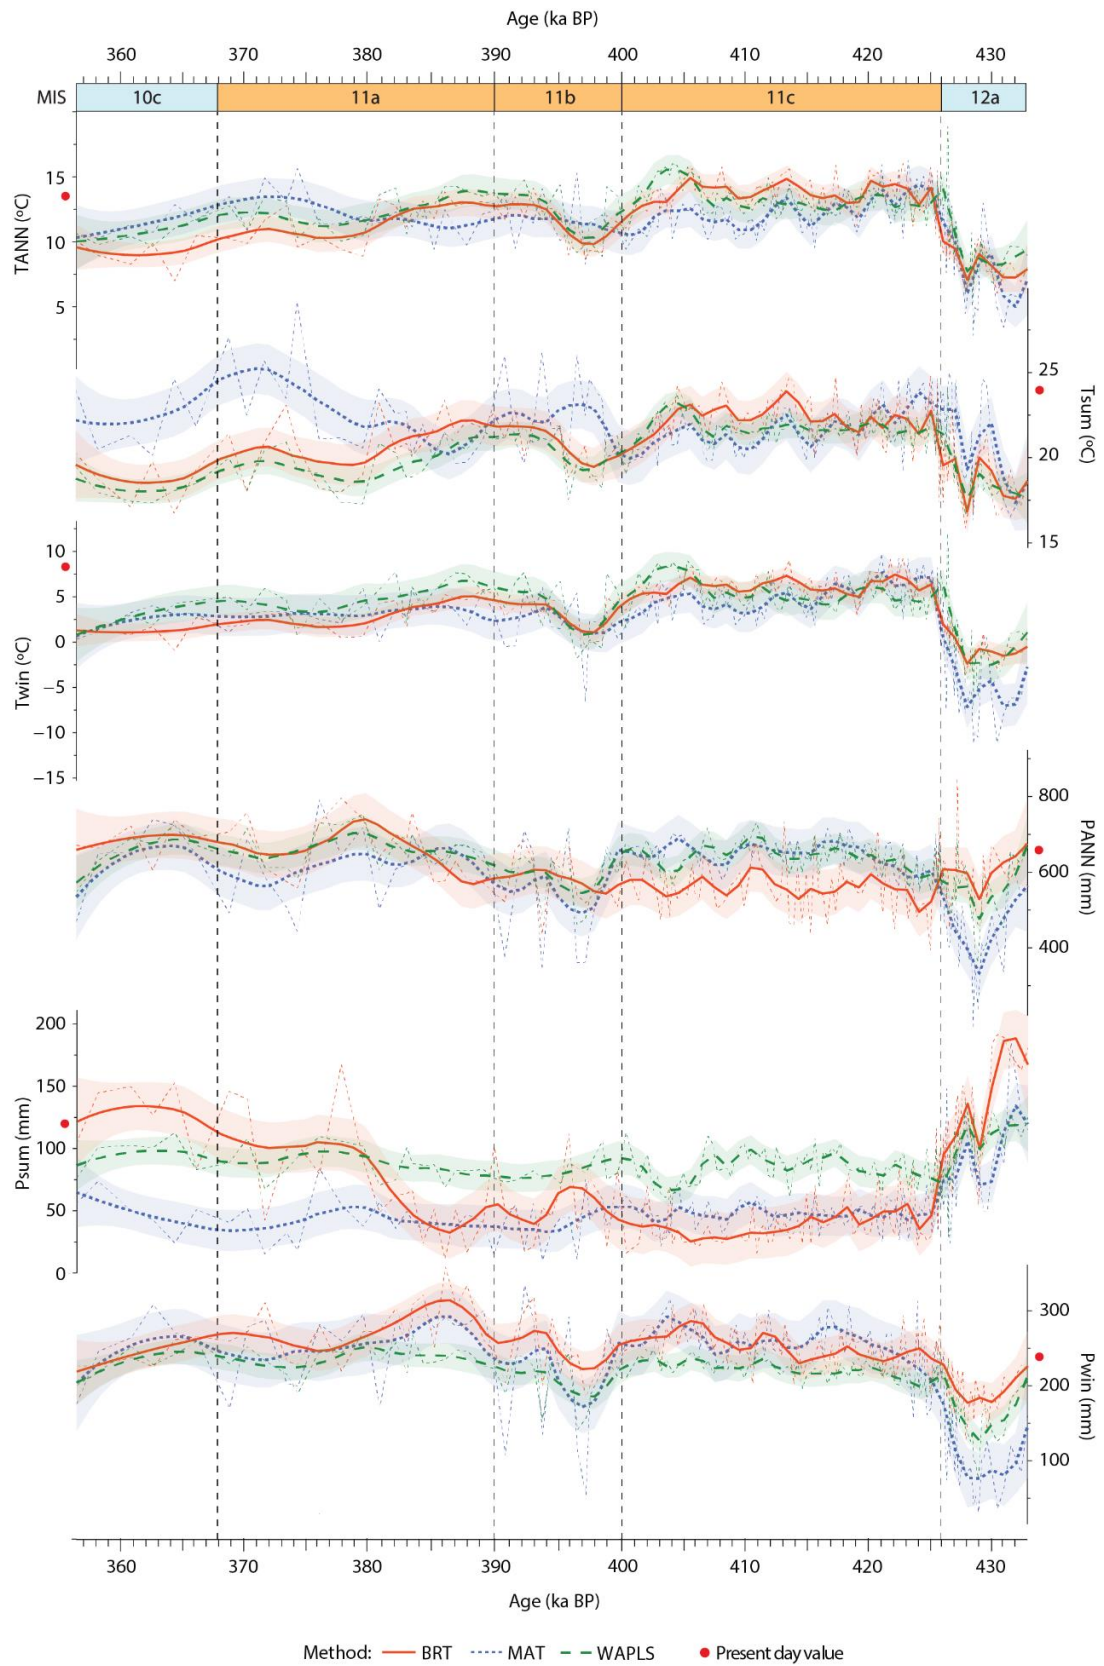

Figure S4 – Quantitative climate reconstructions from pollen analyses obtained for MIS 5 using the BRT (red: dotted line corresponds to error), MAT (blue) and WAPLS (green) methods. Present-day values for temperature (TANN, Tsum and Twin) and precipitation (PANN, Psum and Pwin) are represented by red dots.

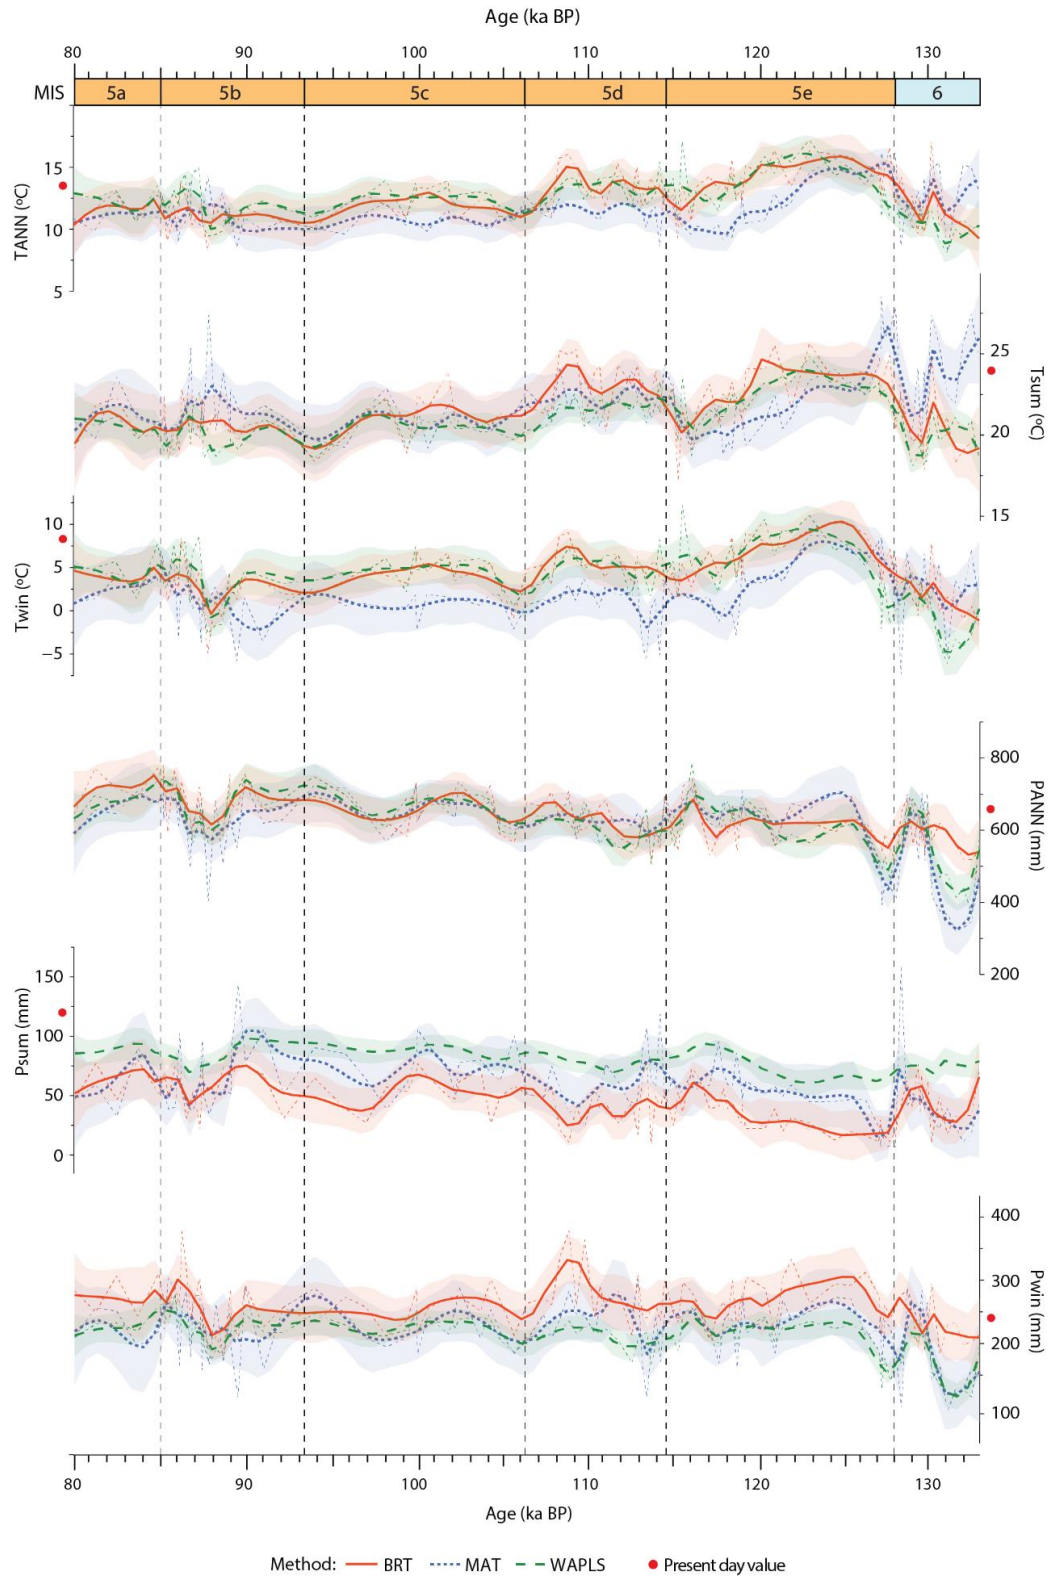



Figure S5 – Quantitative climate reconstructions from pollen analyses obtained for MIS 19 using the BRT (red: dotted line corresponds to error), MAT (blue) and WAPLS (green) methods. Present-day values for temperature (TANN, Tsum and Twin) and precipitation (PANN, Psum and Pwin) are represented by red dots.

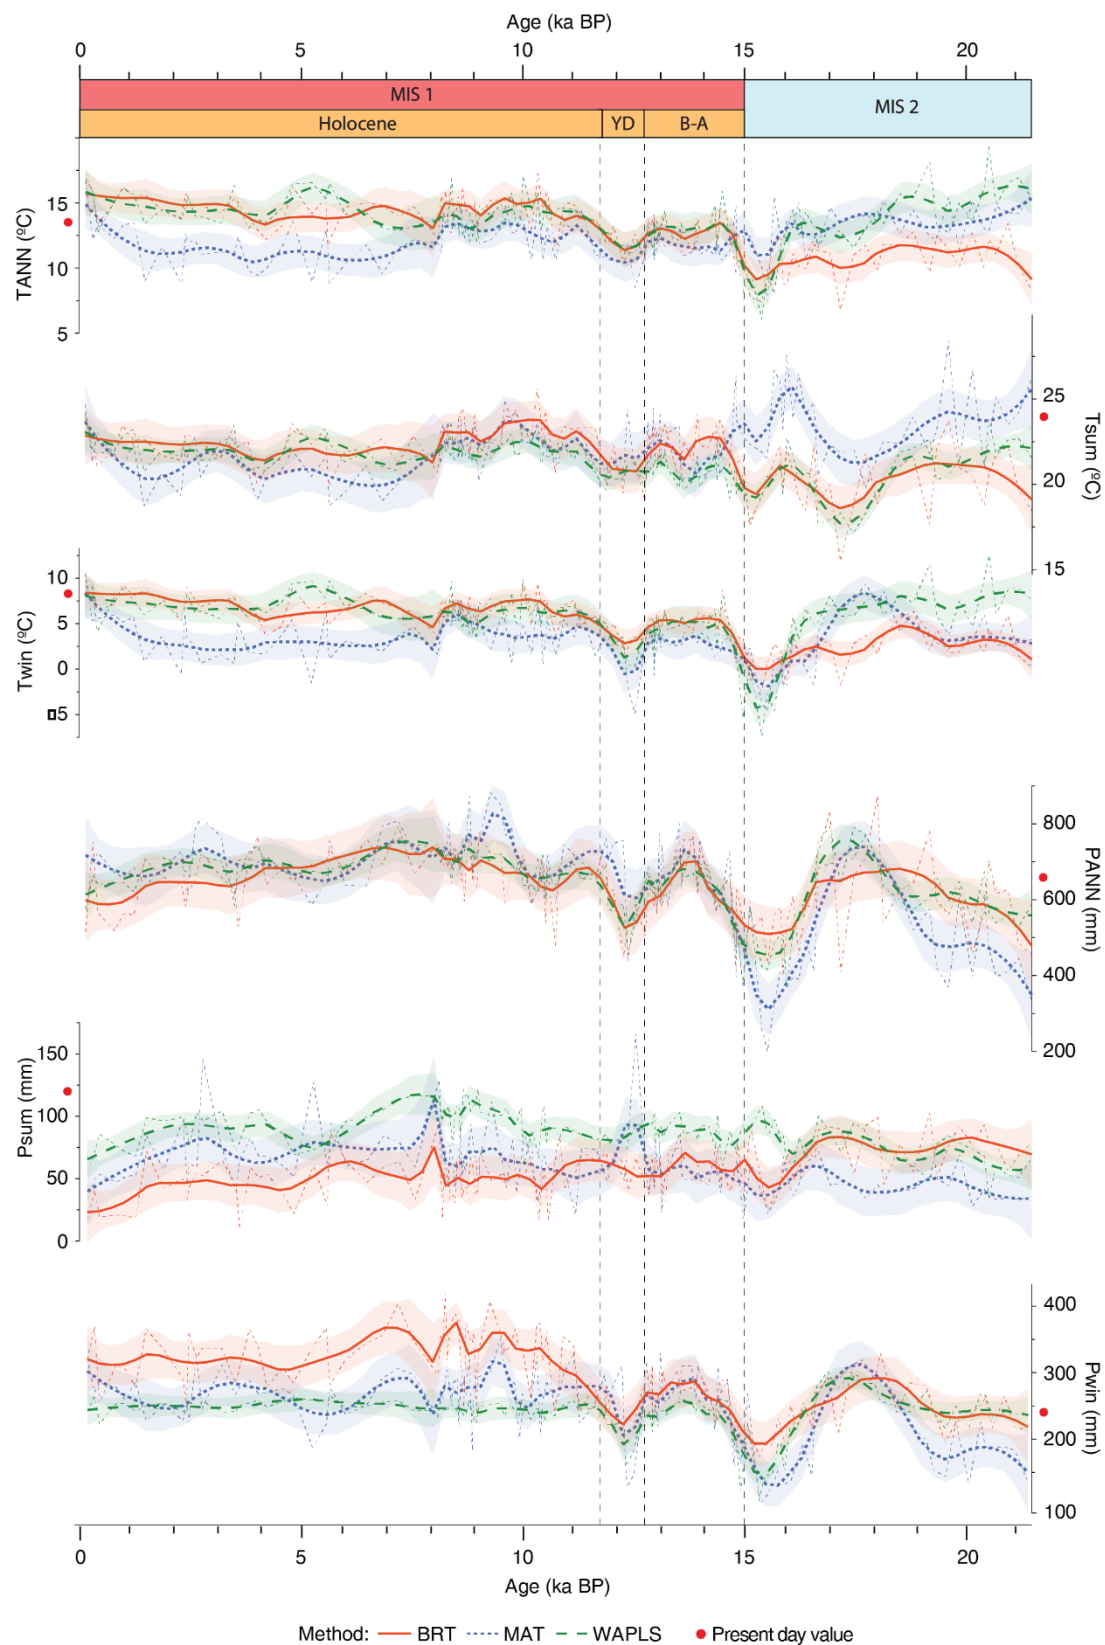

Supplement: Supplementary file 2 [file cp-21-489-2025-supplement.zip]
