# Supplementary figures and images for: Pollen-based climatic reconstructions for the interglacial analogues of MIS 1 (MIS 19, 11, and 5) in the southwestern Mediterranean: insights from ODP Site 976
Source: Copernicus journal article supplement (doi:10.5194/cp-21-489-2025), 2025-02-18

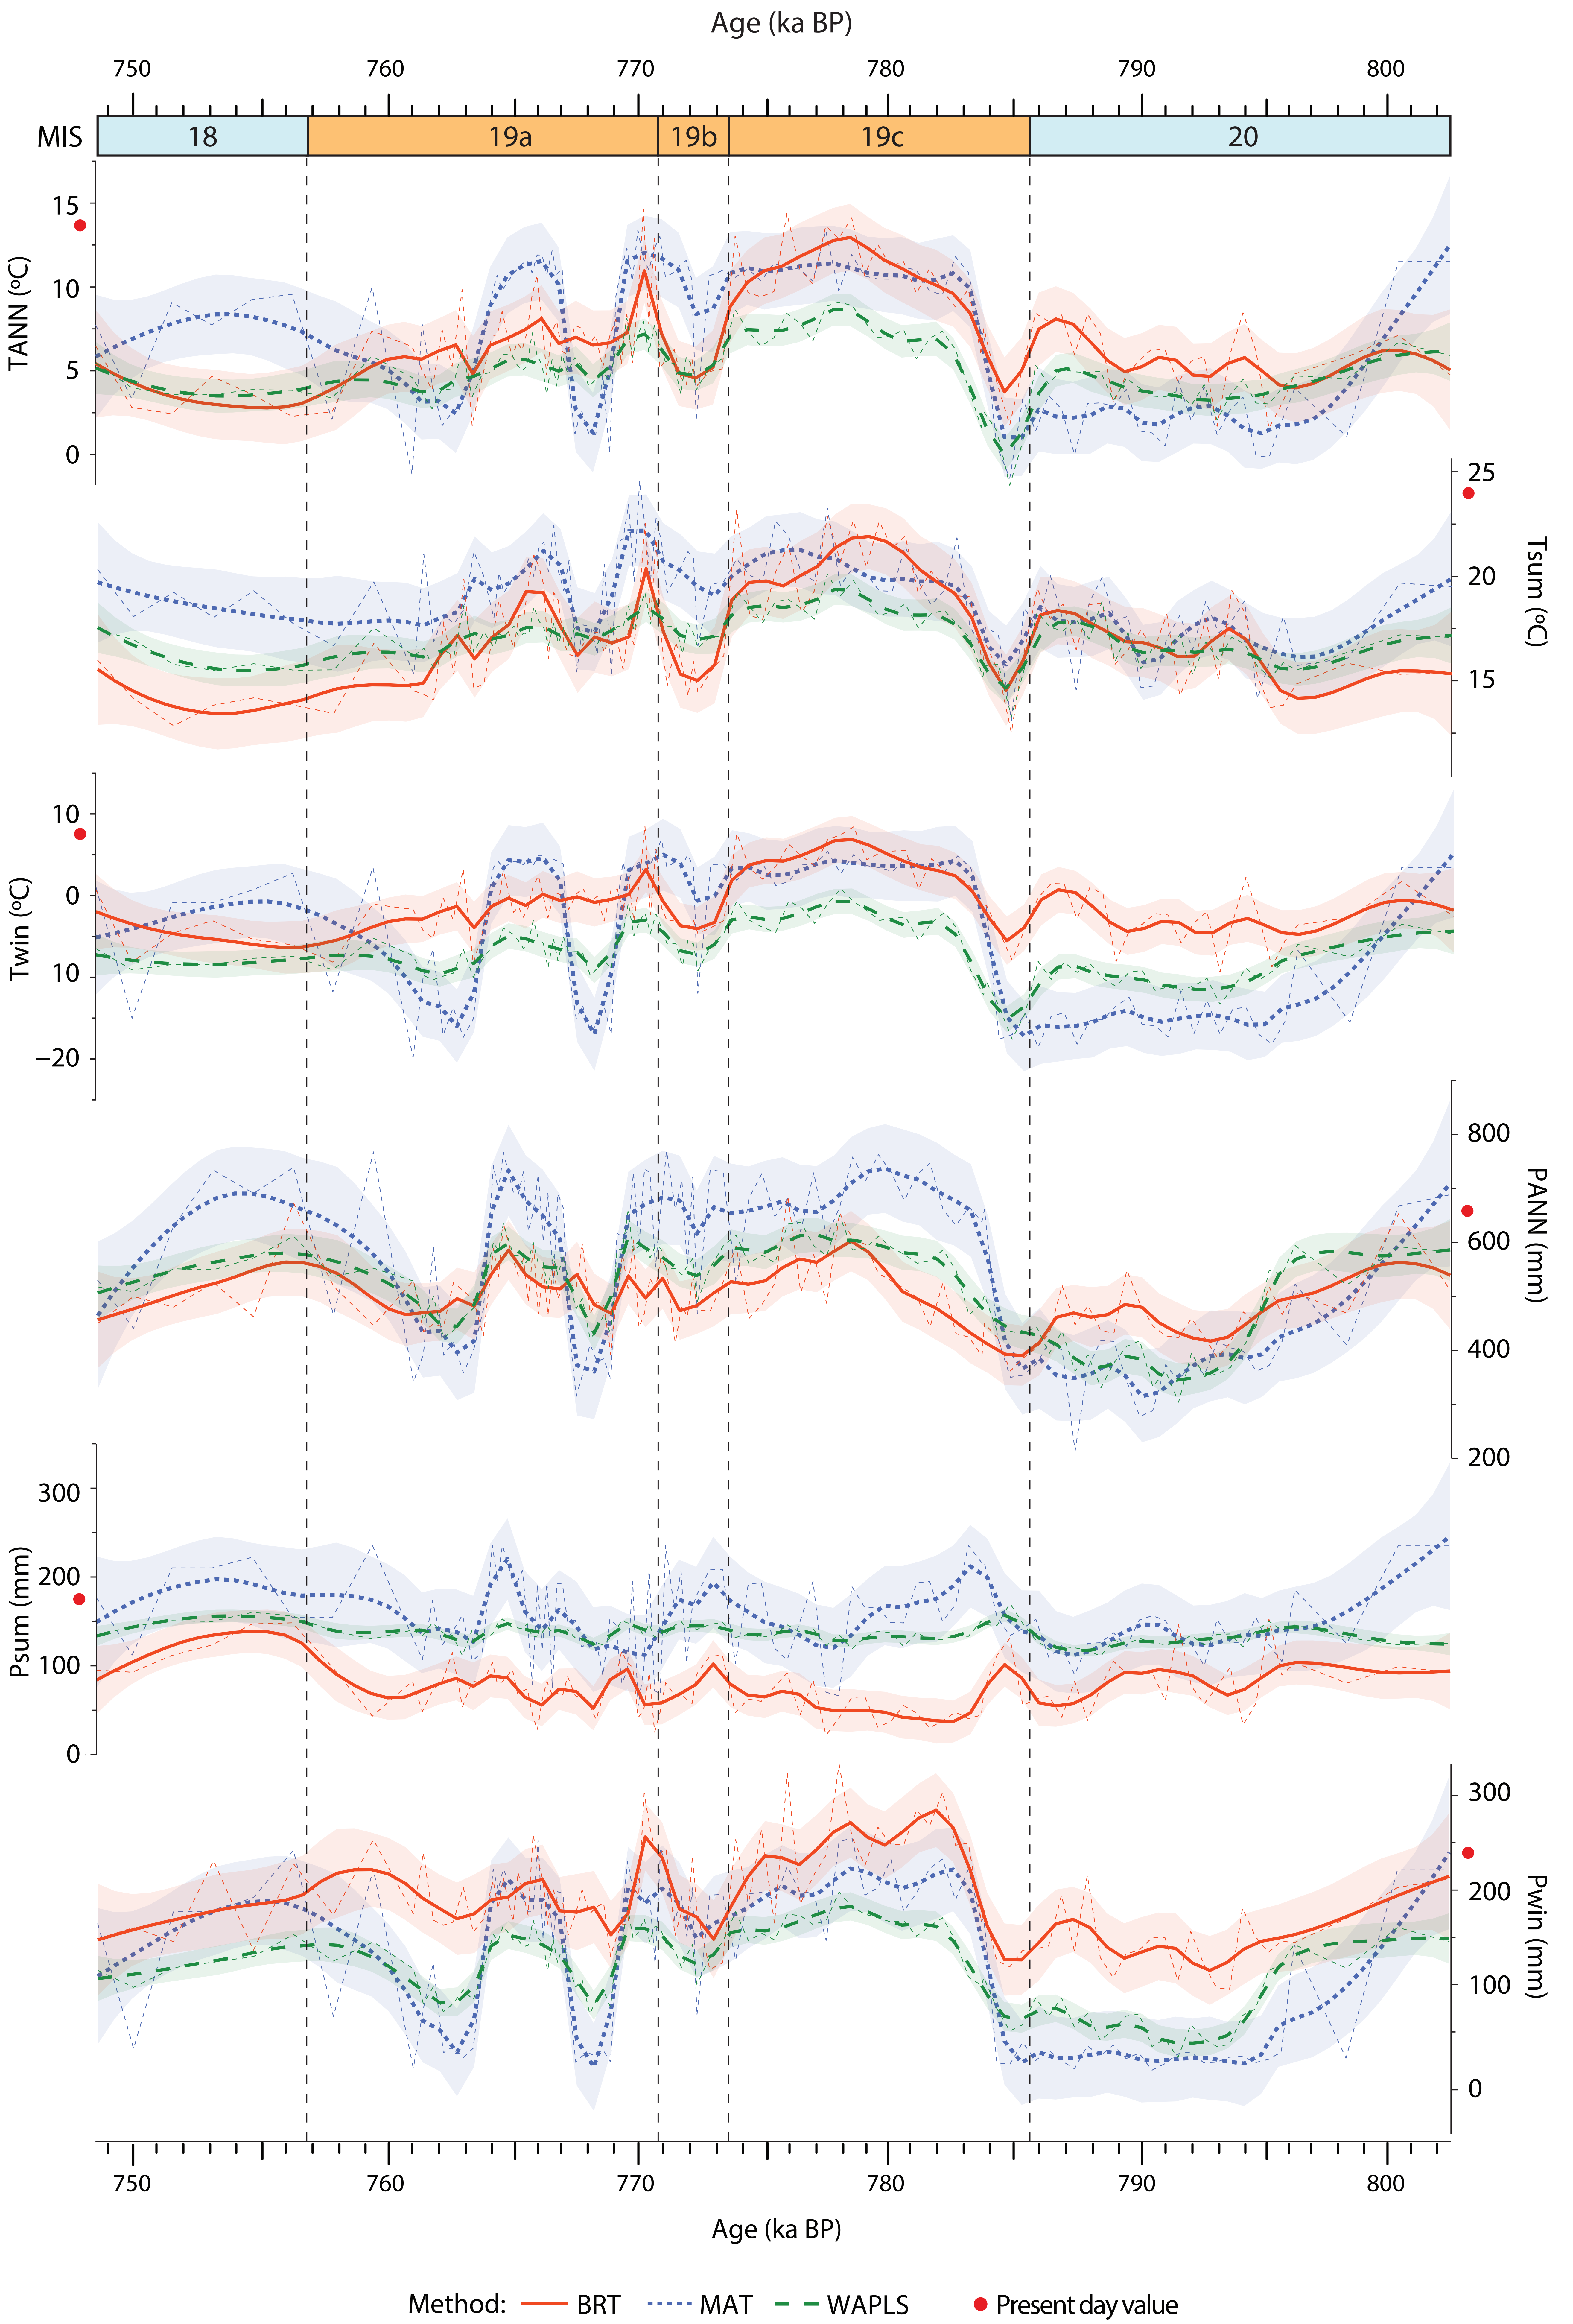

Supplement: Supplementary file 3 [file cp-21-489-2025-supplement.zip]

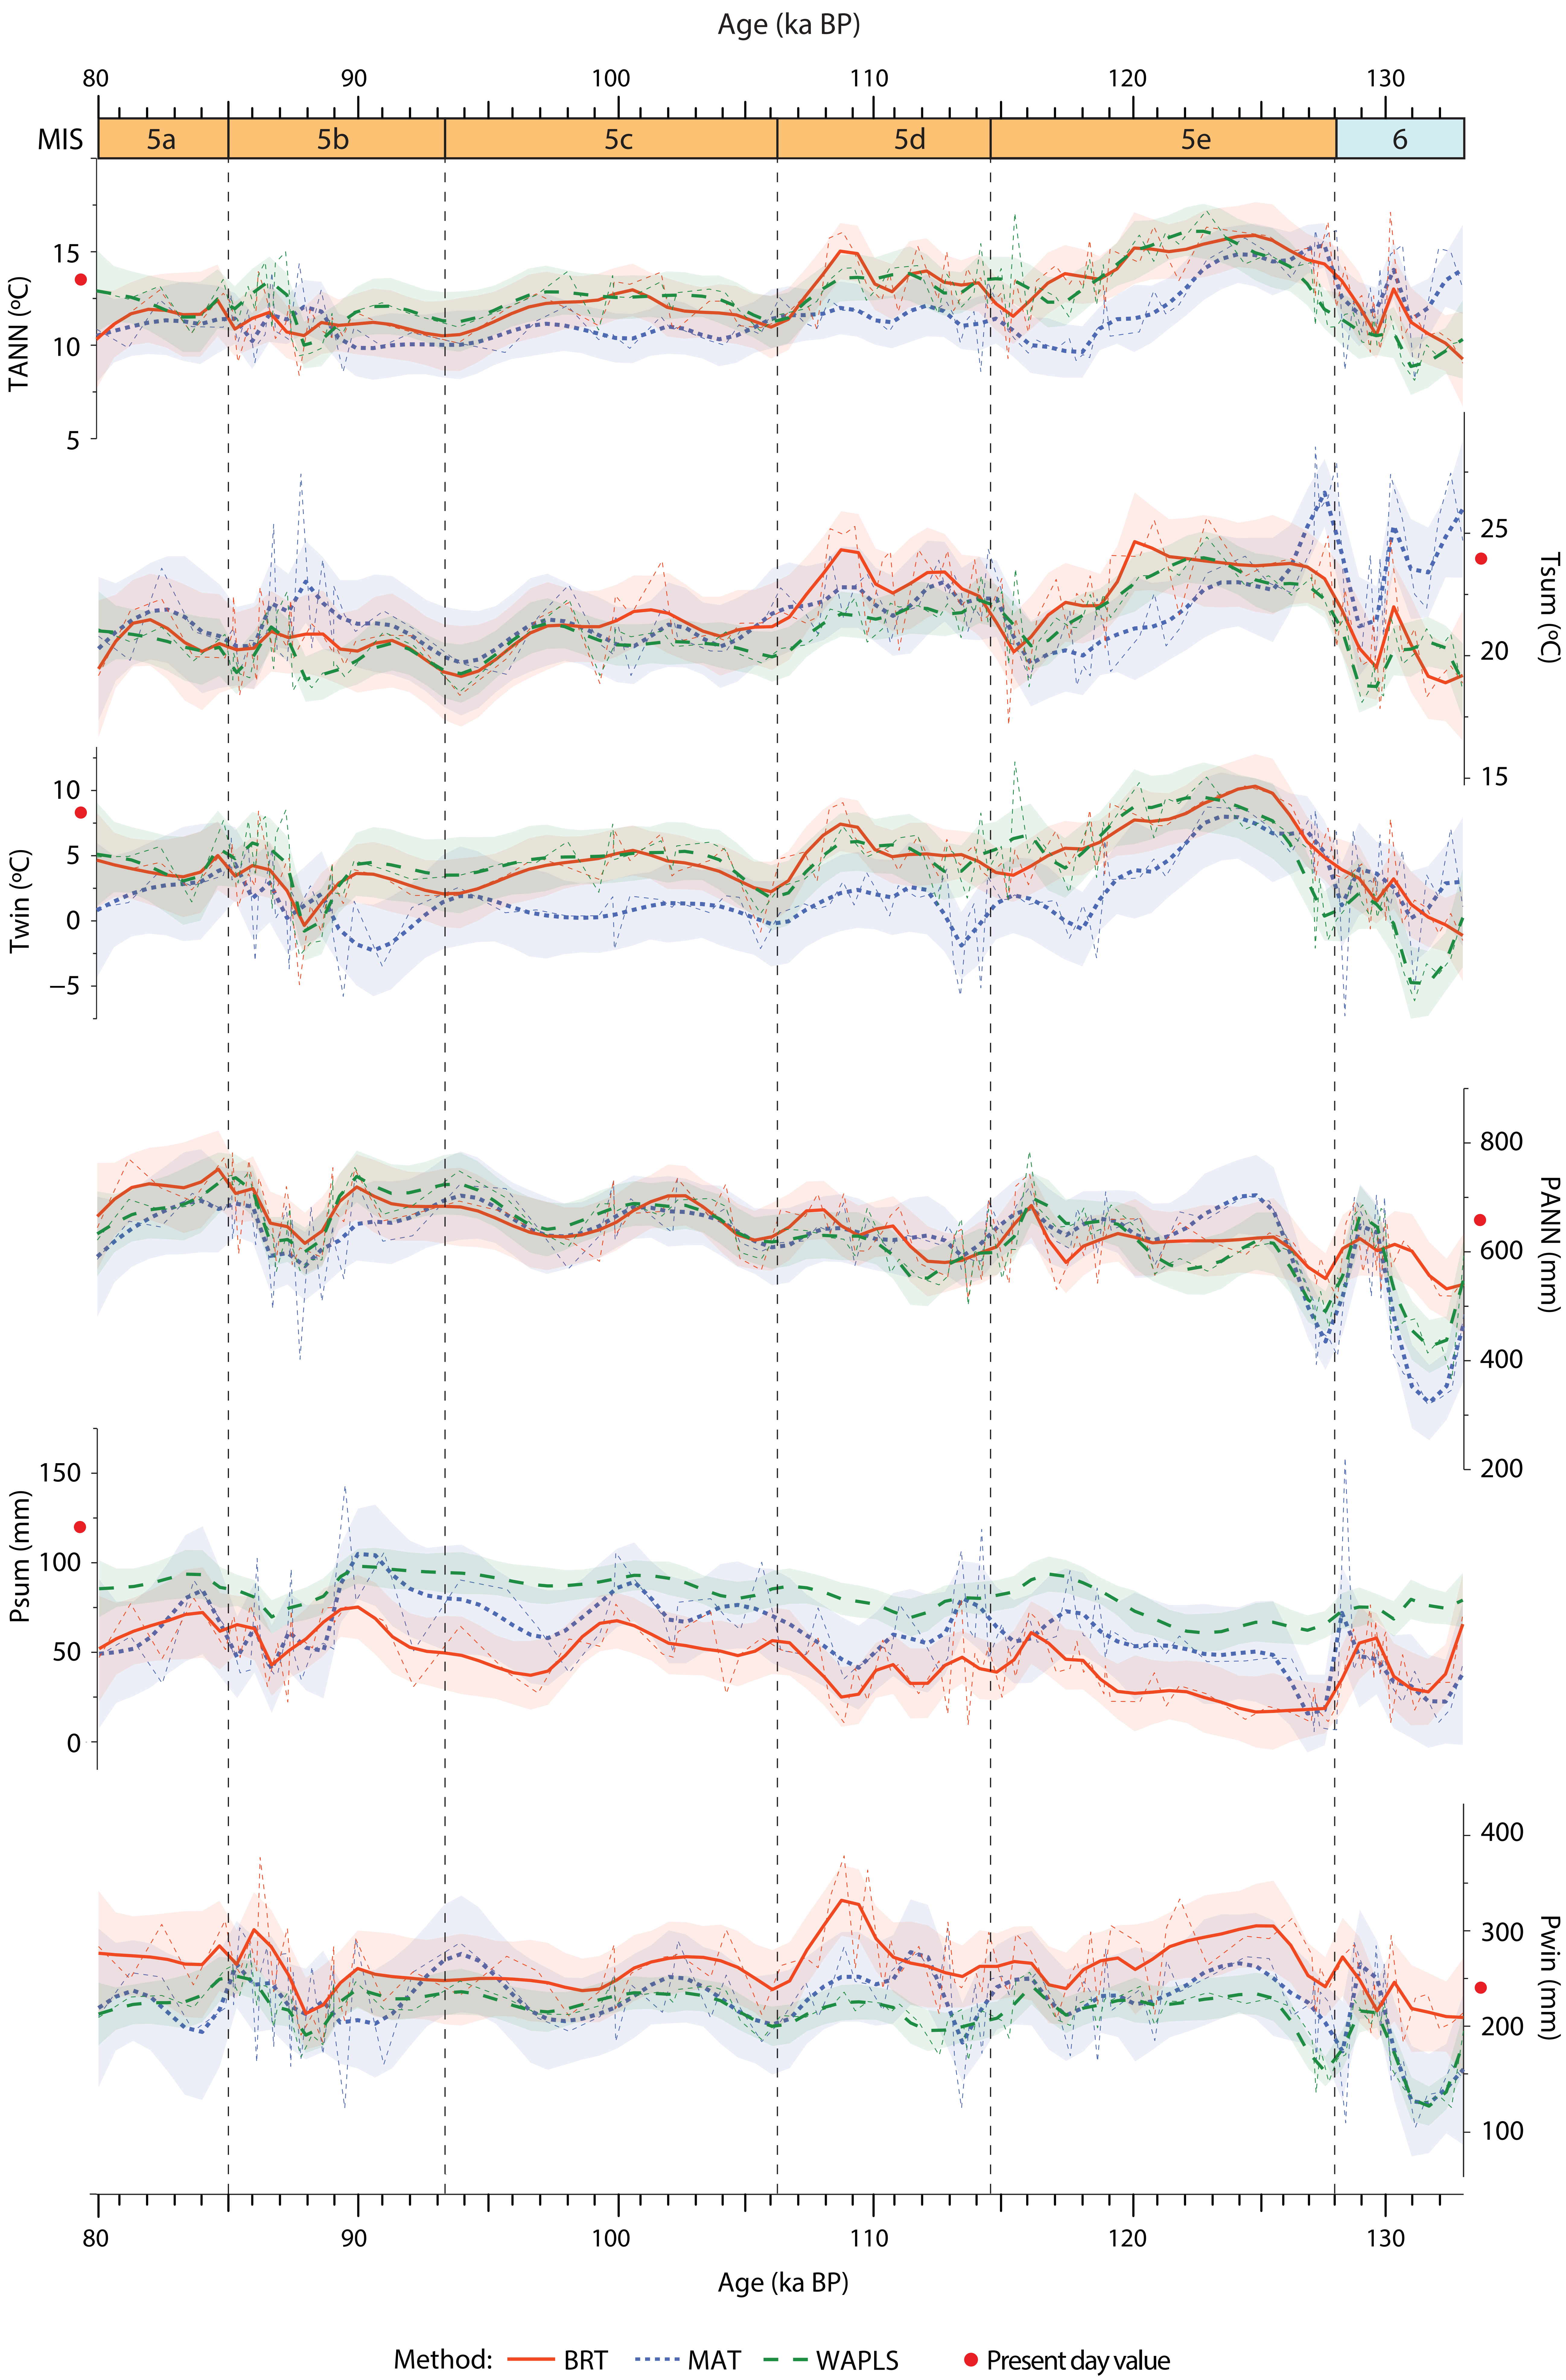

Supplement: Supplementary file 4 [file cp-21-489-2025-supplement.zip]

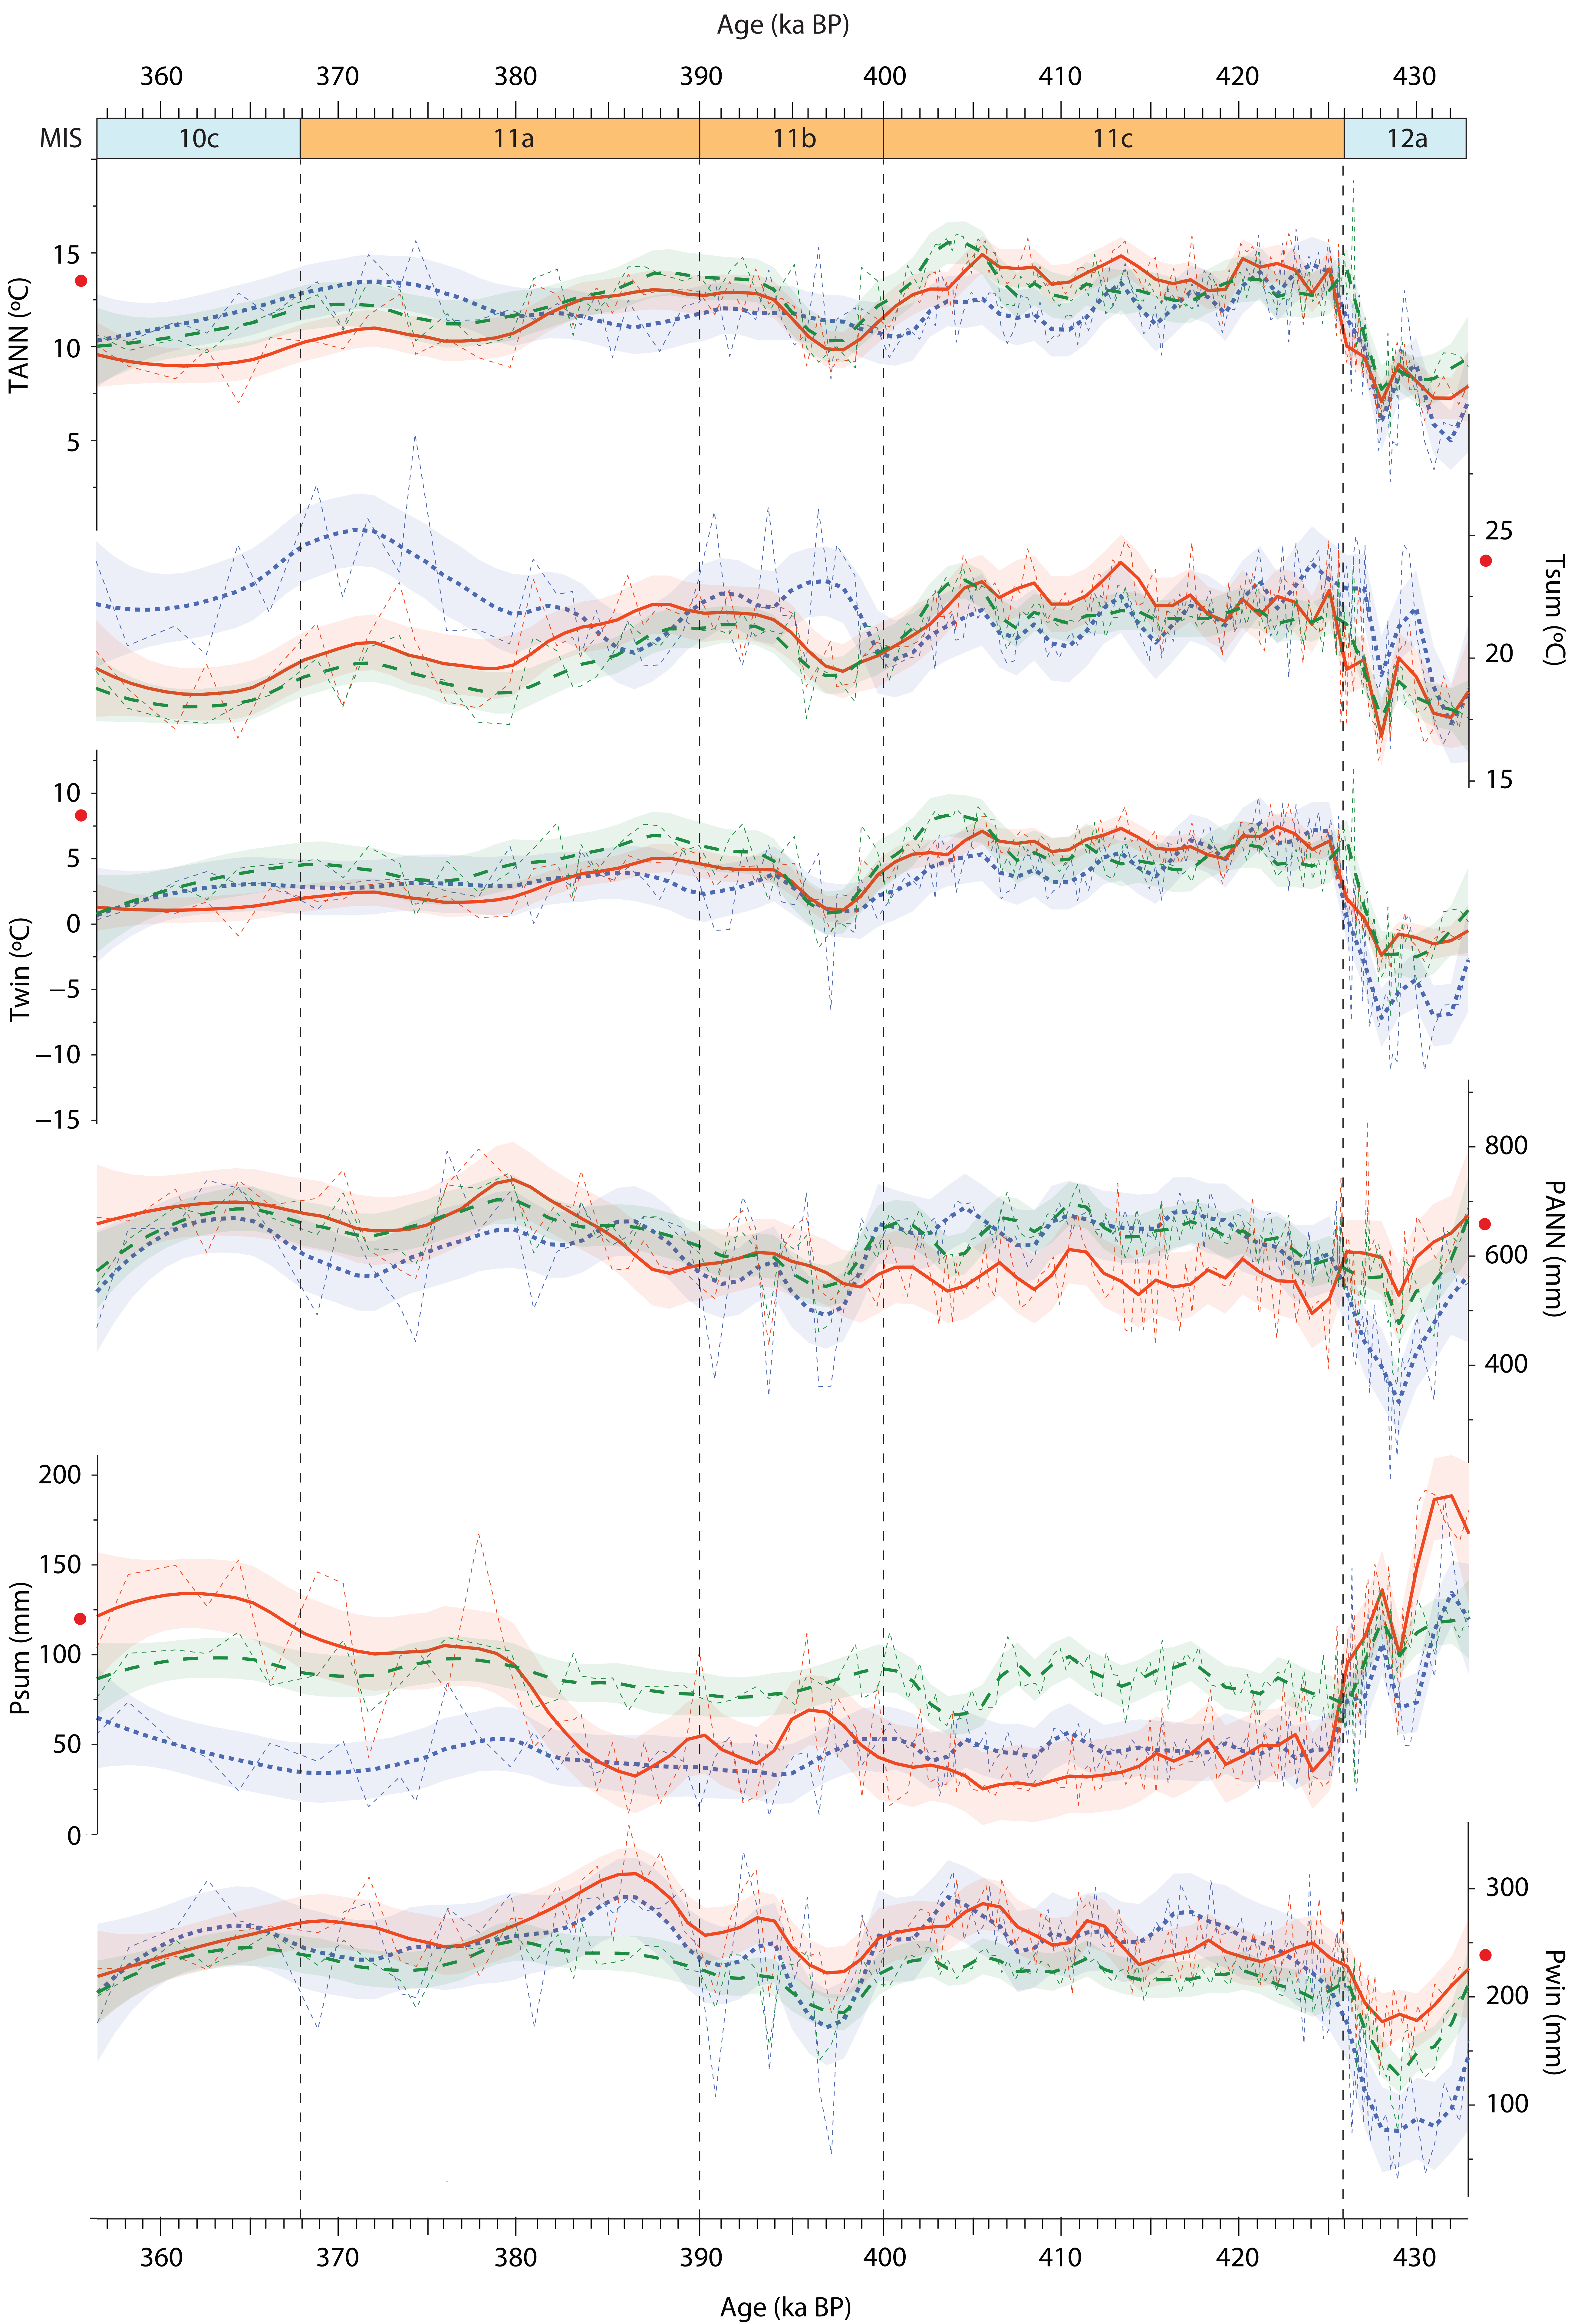

Supplement: Supplementary file 5 [file cp-21-489-2025-supplement.zip]

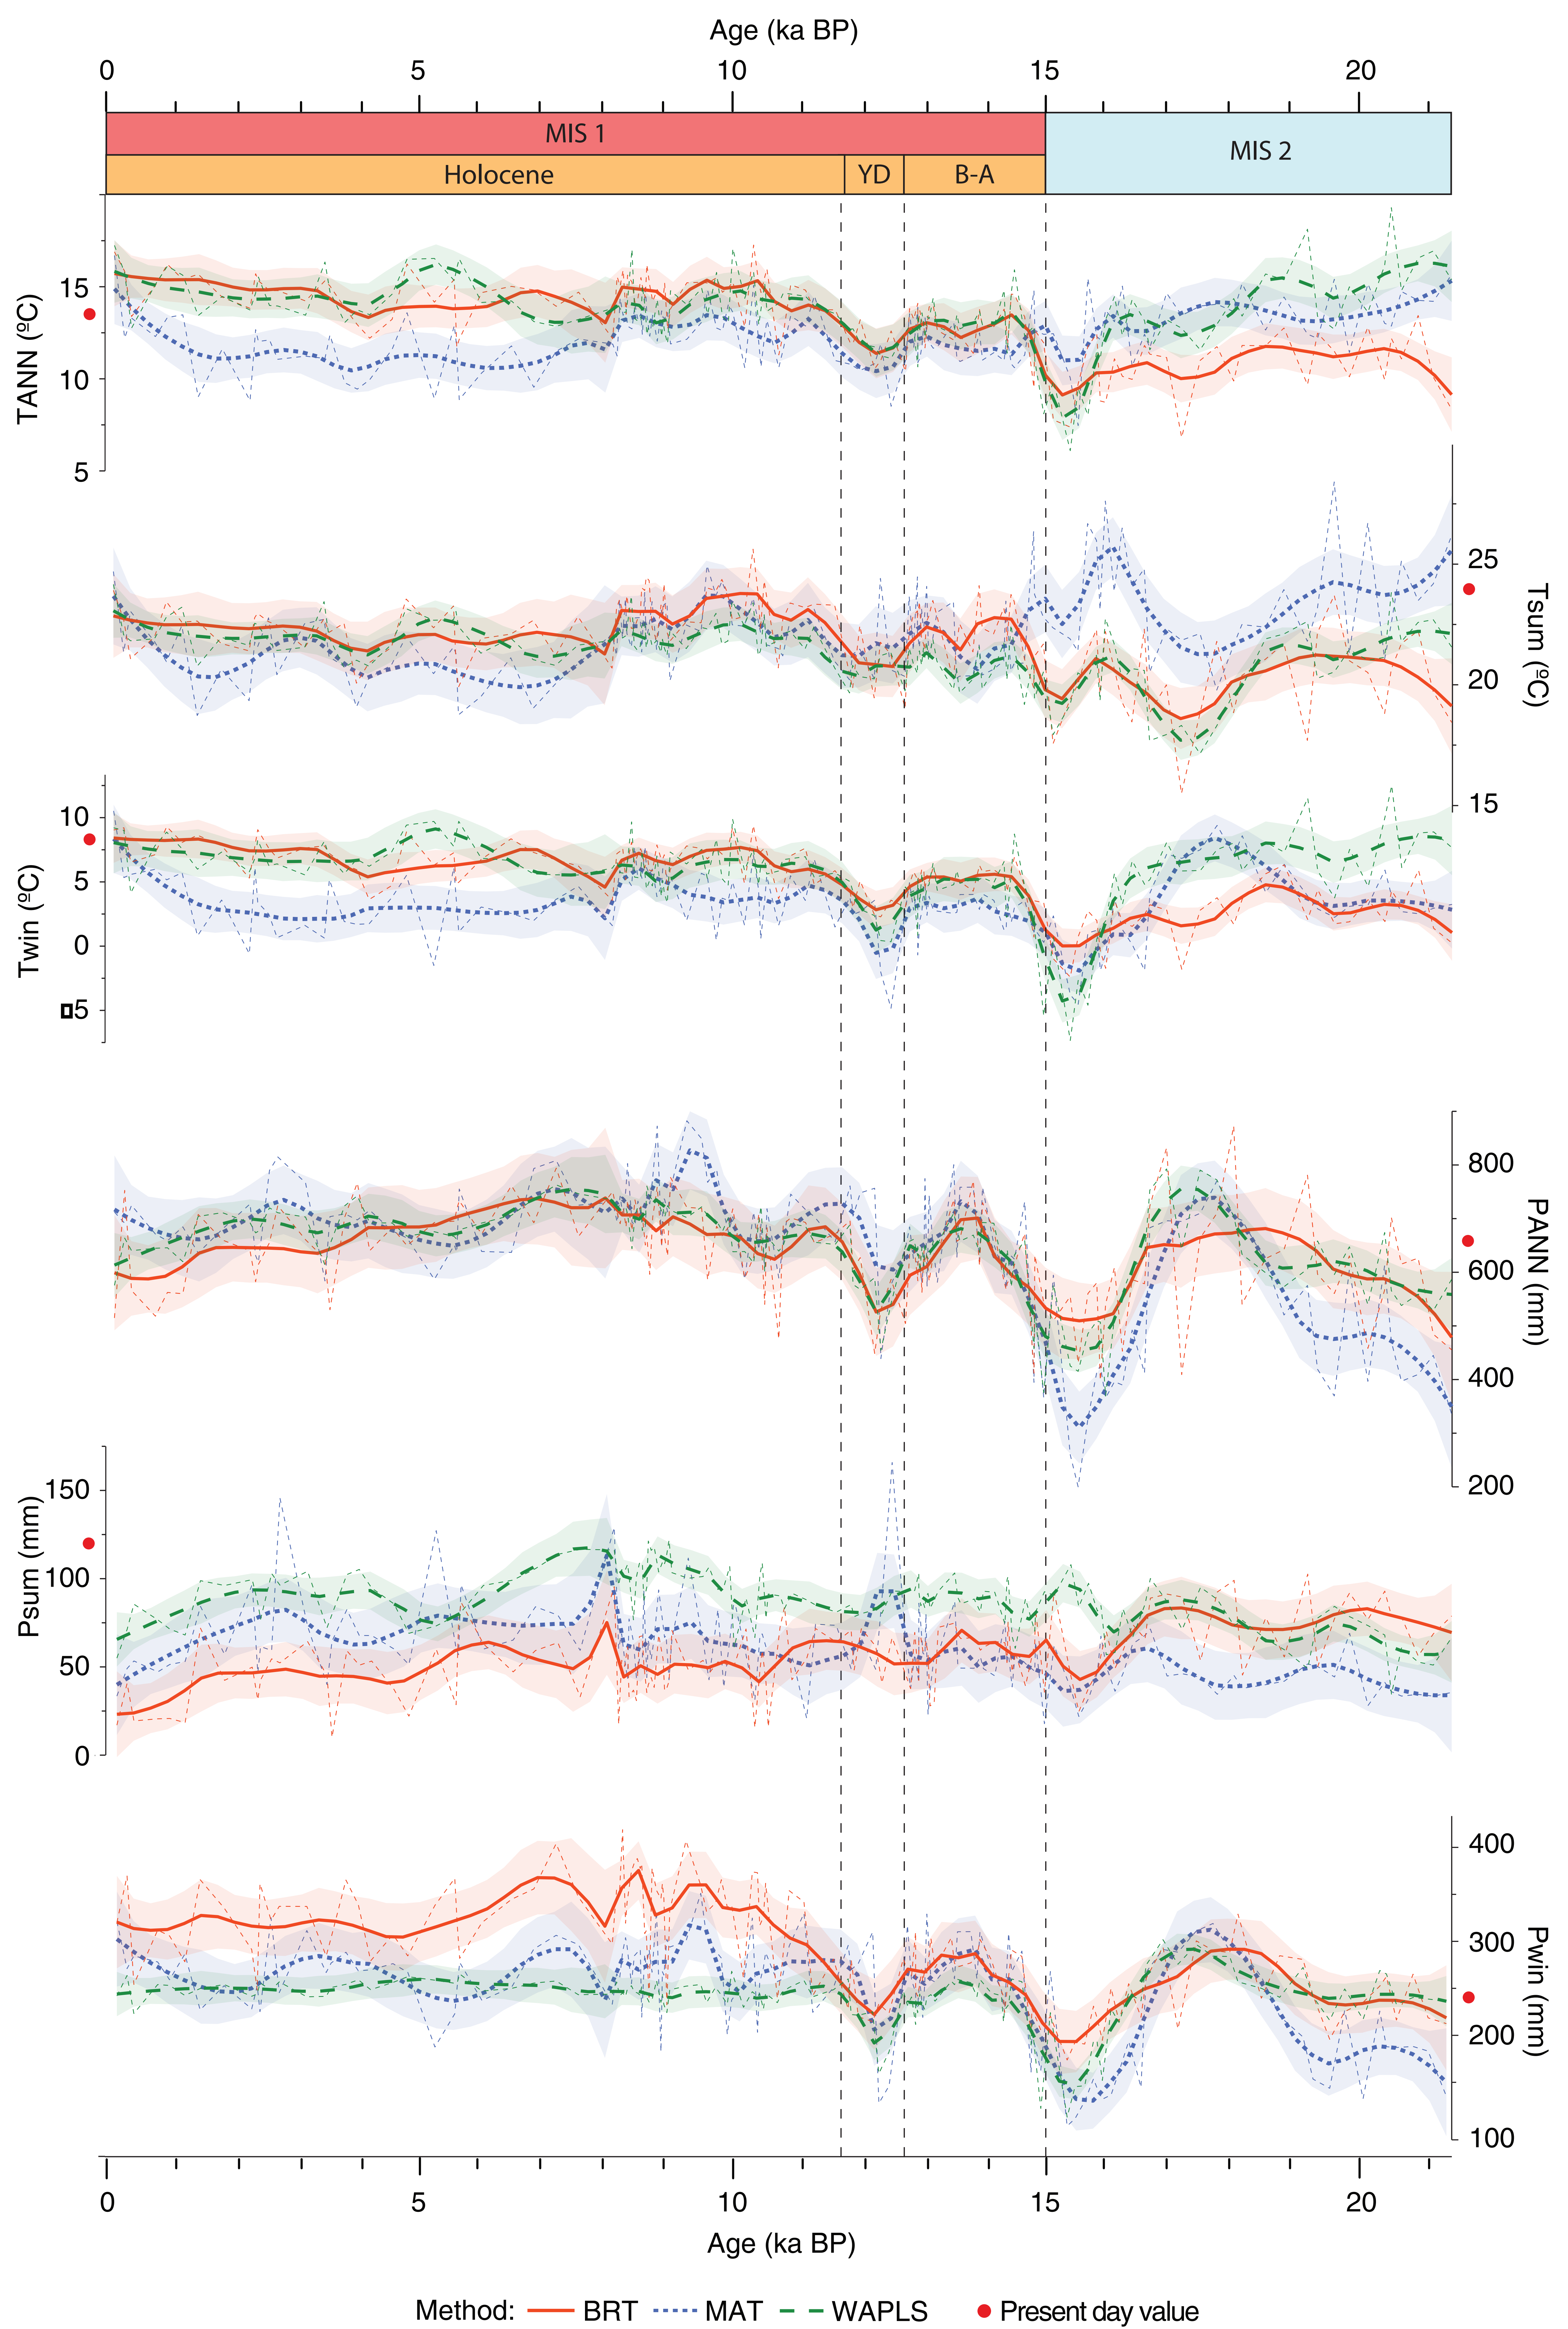

Supplement: Supplementary file 6 [file cp-21-489-2025-supplement.zip]

Temperate taxa (%)  
Mediterranean taxa (%)

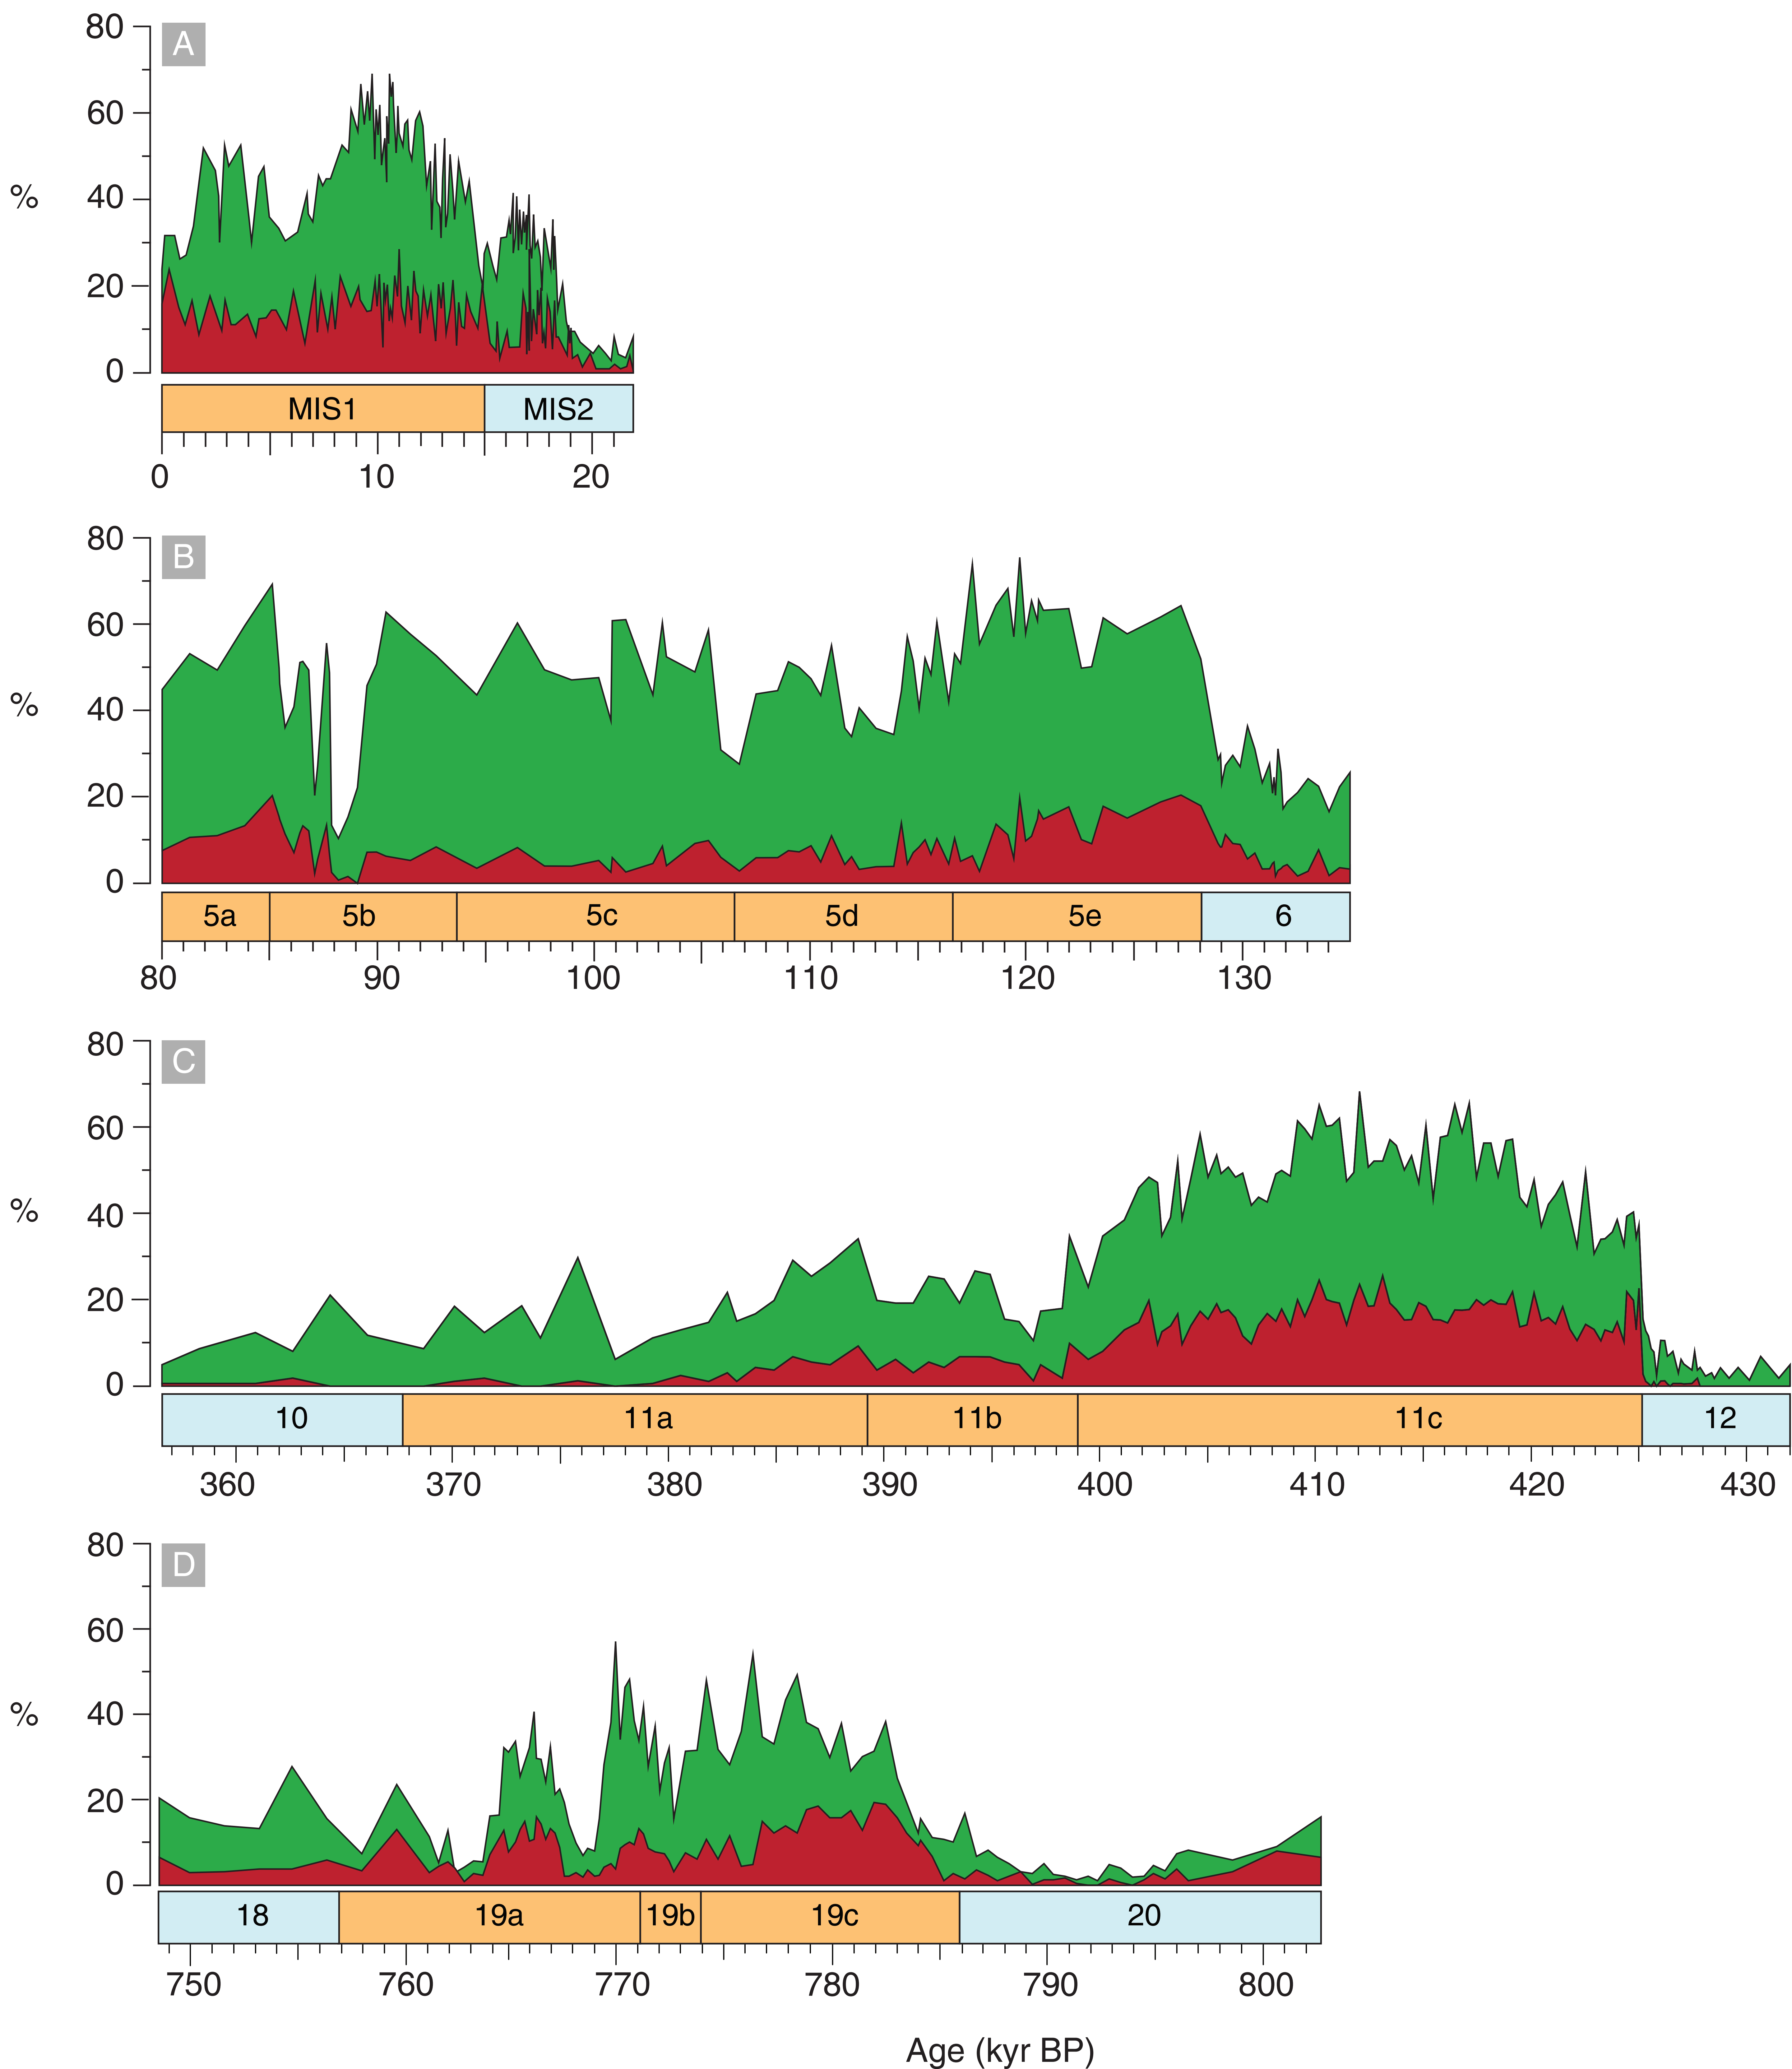

Supplement: Supplementary file 7 [file cp-21-489-2025-supplement.zip]
